# Supplementary material for: A simple cost-effective and scale-less empirical approach to harvest strategies
Source: Oxford University Press journal article supplement (doi:10.1093/icesjms/fsr029), 2011-04-12
Supplement: fsr029supp.doc [file fsr029supp.doc]

**Supplementary material: ICES Journal of Marine Science, 68**

**A simple cost-effective and scale-less empirical approach to harvest strategies**

Jeremy D. Prince, Natalie A. Dowling, Campbell R. Davies,

Robert A. Campbell, and Dale S. Kolody

**Population dynamics equations**

The population dynamics are based on a one-area population equation for non-recruits; the numbers at age *a*, of gender *g*, in year *t* are the survivors from age *a*–1 in year *t*–1, where the total (natural and fishing) mortality on that age class is *Zt*–1,*a*–1,*g*:

*Nt*,*a*,*g* = *Nt*–1,*a*–1,*g*e(–*Zt*–1,*a*–1,*g*) . (S1)

The total mortality at time *t*, age, *a*, of gender *g*, *Zt*,*a*,*g*,is the sum of the fishing mortality-at-age by gender, *Ft*,*a*,*g*, and the instantaneous rate of age-specific natural mortality, *Ma* (note, however, that for most simulations, natural mortality was constant over all ages):

. (S2)

Note that natural mortality is assumed constant over time.

The fishing mortality at time *t*, (quarterly) age *a* for gender *g*, *Ft*,*a*,*g* is calculated from

, (S3)

where *Sa*,*g* is the selectivity-at-age *a* for gender *g*, and *ft* is the total fishing mortality in time-step *t*.

The population numbers at time *t*, age *a*, gender *g*, is given by

, (S4)

where *x* is the maximum age (above which all fish are combined as a plus group), chosen so that selectivity, fecundity, and natural mortality for ages *x* and greater can reasonably be assumed to be the same. *Za*,*t*,*g* is the total (natural and fishing) mortality at age *a* and time *t* of gender *g*.

Recruitment occurs in the first two quarters of the year and is calculated for each quarter using a Beverton–Holt stock–recruit relationship with lognormal error. Total recruitment in a year is therefore *N*1,0,*g* + *N*2,0,*g*. This does not strictly equate to a Beverton–Holt relationship, because the sum of the recruits associated with each quarter does not equate to that given by the Beverton–Holt equation for the combined spawner biomass from each quarter. The total number of recruits of each gender, *g*, in any time-step *t* is given by

for quarter = 1 or 2

= 0 for quarter = 3 or 4, (S5)

where α and β are the parameters of the stock–recruitment relationship, *Bt* the spawning biomass at time (quarter) *t*, *Kg* the fraction of recruits assigned to gender group *g* (for an equal proportion of males and females, *K*1 = *K*2= 0.5), and *σR* is the standard deviation of the logarithm of the fluctuations in recruitment (note that the error term can be omitted to yield deterministic recruitment).

The stock–recruit relationship is reparametrized in terms of steepness, *h*, unexploited spawning biomass, *B*0, and recruitment of the unexploited stock, *R*0, where steepness is defined as the ratio between recruitment (*R*) when spawning biomass is at 20% of unexploited spawning biomass (*B*0) and recruitment at the unexploited spawning biomass i.e. *h = R*(0.2*B*0*) / R*(*B*0):

(S6a)

. (S6b)

The spawning biomass, *Bt* ,is calculated as the sum of the weight of all mature individuals (males and females in this case):

, (S7)

where *G* is the number of gender groups, *y* the number of areas, *pg,a* the proportion of the population of gender *g*, age *a*, that is mature, and is the body weight of an individual of gender *g*, age *a*. Maturity-at-age is assumed to be knife-edged at age *tm*.

The mean body weight of individuals of each gender and in each age class is obtained from a von Bertalanffy growth curve and a length–weight relationship. The size of an individual in gender group *g*, age *a* is

. (S8)

The mean weight-at-age was derived from a power relationship to mean length-at-age:

.(S9)

The catch numbers in each quarterly time-step *t* for quarterly age *a* are calculated using the traditional catch equation with a lognormal error term:

. (S10)

Equation (S10) is solved for *ft* given the recommended biological catch RBC*t*.
